# Supplementary material
Source: PubMed Central journal article supplement (PMC4302837)
Supplement: supp_dev.118307_DEV118307supp.pdf [file supp_dev.118307_DEV118307supp.pdf]

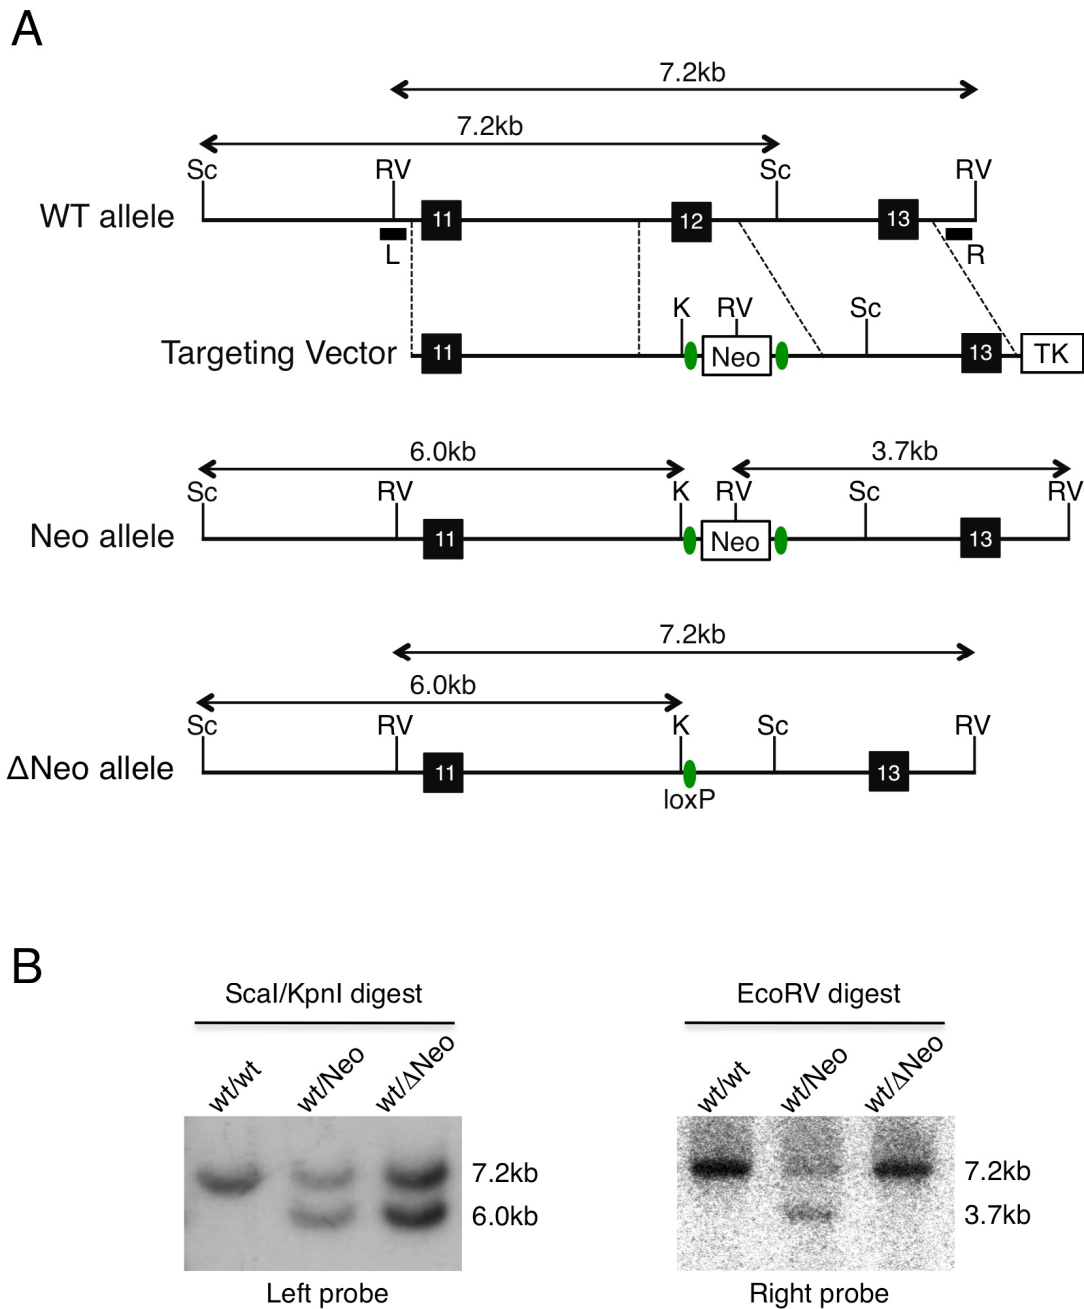

**Fig. S1. Targeting of exon 12 in the *p63* gene by homologous recombination.**

(A) Targeting strategy. Targeting vector consists of a 3.2 kb homologous left arm, a *loxP*-flanked neomycin resistant cassette (Neo), a 2.3 kb homologous right arm and a thymidine kinase cassette (TK). The neomycin cassette was removed from the Neo allele by crossing heterozygous mutant mice with Act $\beta$ -Cre transgenic mice, resulting in the generation of heterozygous *p63*<sup>C<sup>-/-</sup></sup> mice harboring a  $\Delta$ Neo allele. Solid lines

indicate the position of the left (L) and right (R) probes used for Southern blot analysis. Ovals in *green* dictate *loxP* sites. *Sc*, ScaI; *RV*, EcoRV; *K*, KpnI. **(B)** Southern blot analysis. Genomic DNA was digested with a combination of ScaI and KpnI (left panel) and EcoRV alone (right panel) and the membranes were hybridized with [<sup>32</sup>P]dCTP-labeled probes.

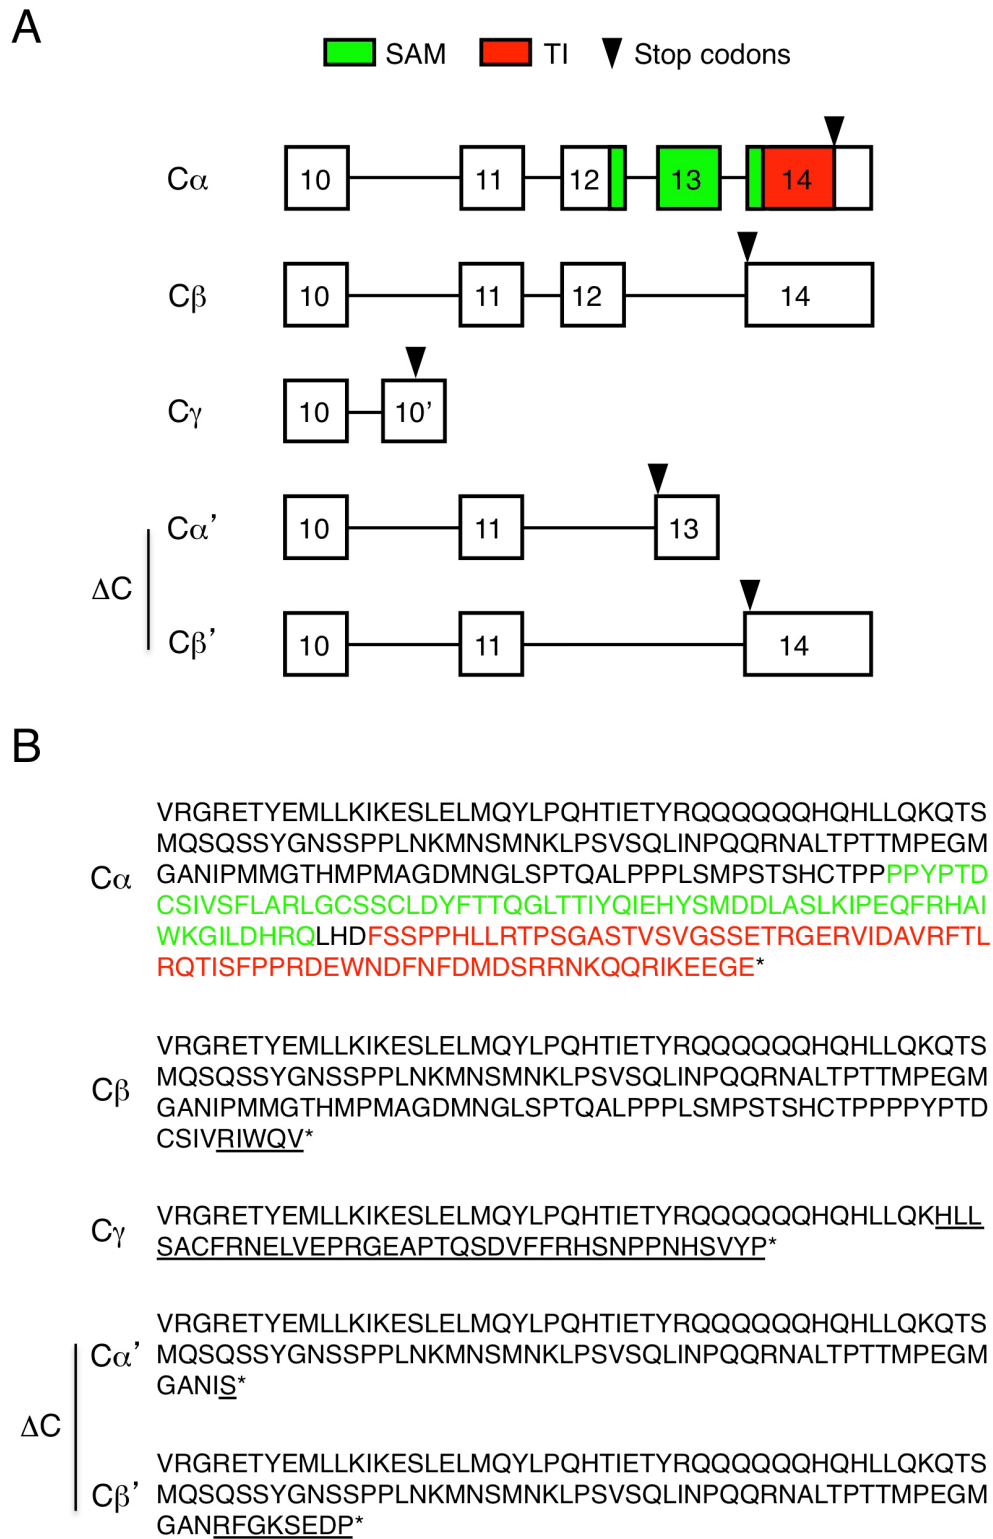

**Fig. S2. Splicing and amino acid sequences of the C-terminus of p63 isoforms.**

(A) Exon-intron structures at the C-terminus of p63 isoforms. WT mice express *C<sub>α</sub>*, *C<sub>β</sub>* and *C<sub>γ</sub>* isoforms while *p63<sup>C-/-</sup>* mice express *C<sub>α</sub>'* and *C<sub>β</sub>'* isoforms as well as *C<sub>γ</sub>*

isoform. **(B)** Amino acid sequences of the C-terminus of each p63 isoform. Sequences prior to exon 10 are not shown. *Green* and *red* sequences correspond to the p63<sup>SAM</sup> and p63<sup>TI</sup> domain, respectively. Asterisks indicate stop codons. Sequences unique to each isoform as compared to C $\alpha$  are underlined. Note that C $\alpha$ ' and C $\beta$ ' isoforms differ by only 1 and 8 amino acids at its C-terminus and, therefore, they were not distinguished in this study and are collectively referred to as  $\Delta$ C isoform.

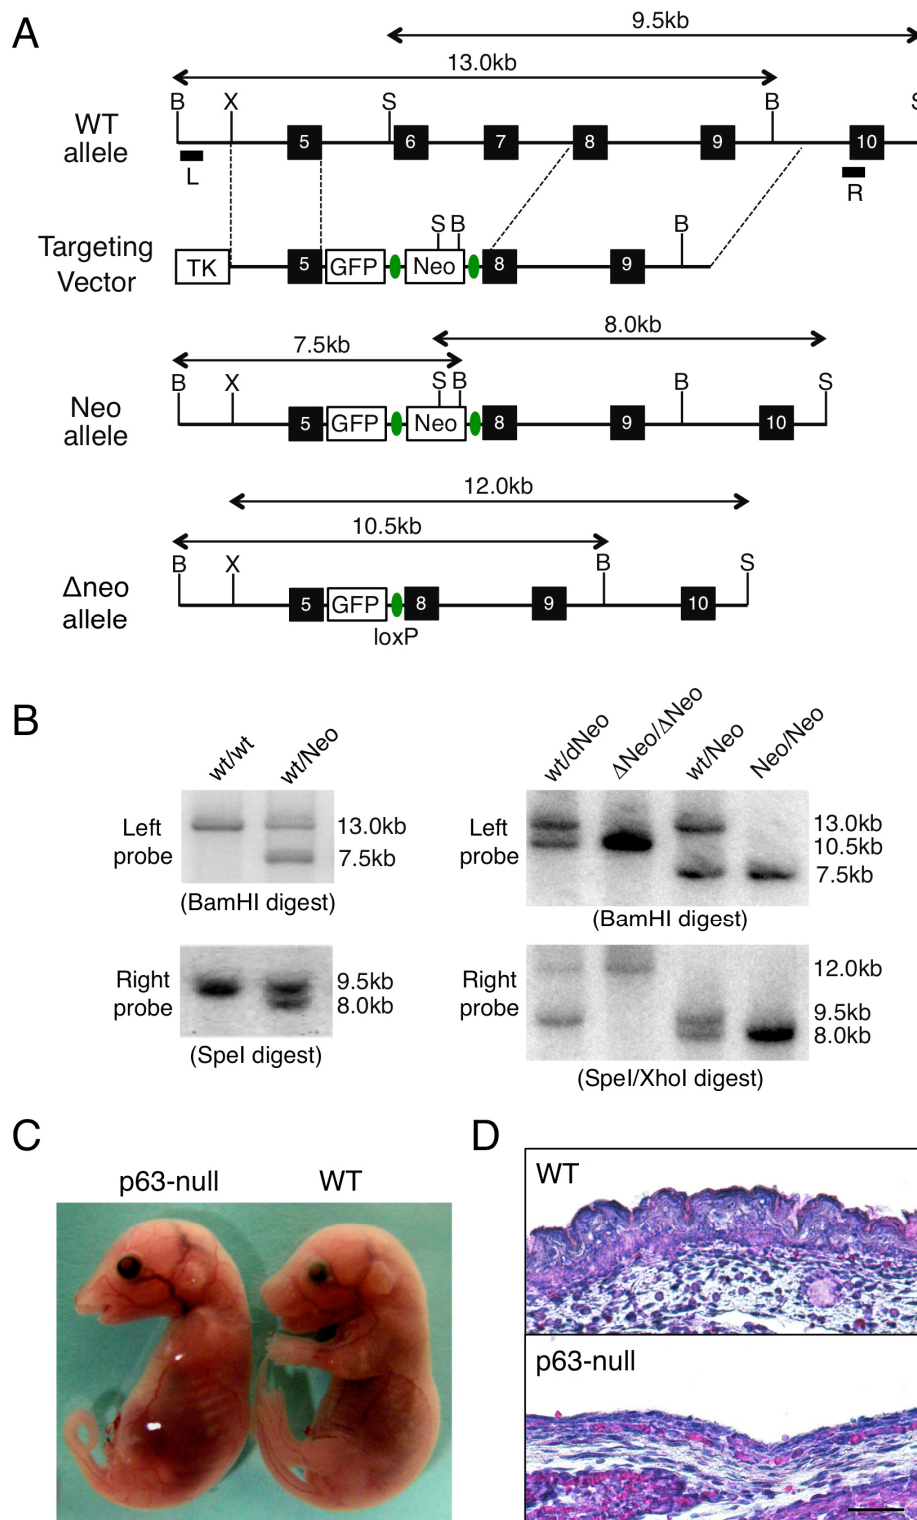

**Fig. S3. Generation of p63-null mice by homologous recombination.**

(A) Targeting strategy. Targeting vector consists of a thymidine kinase cassette (TK), a 5.0 kb homologous left arm, green fluorescent protein (GFP) coding sequences, a

*loxP*-flanked neomycin resistant cassette (Neo) and a 4.2 kb homologous right arm. The neomycin cassette was removed from the Neo allele by crossing heterozygous mutant mice with Act $\beta$ -Cre transgenic mice, resulting in the generation of heterozygous p63<sup>+/-</sup> mice harboring a  $\Delta$ Neo allele. Solid lines indicate the left (L) and right (R) probes used for Southern blot analysis. Ovals in *green* indicate *loxP* sites. *B*, BamHI; *X*, XhoI; *S*, SpeI. **(B)** Southern blot analysis. Genomic DNA was digested with restriction enzymes and the membranes were hybridized with the left probe (top panels) and the right probe (bottom panels). **(C)** Gross appearance of p63-null and WT littermate mice at E17.5. Phenotypes of these p63-null mice are identical to those reported previously (Mills et al., 1999; Yang et al., 1999). **(D)** H&E staining of E17.5 WT and p63-null mouse epidermis. Note that p63-null mice are devoid of epidermis at this stage of development. Scale bar=50  $\mu$ m.

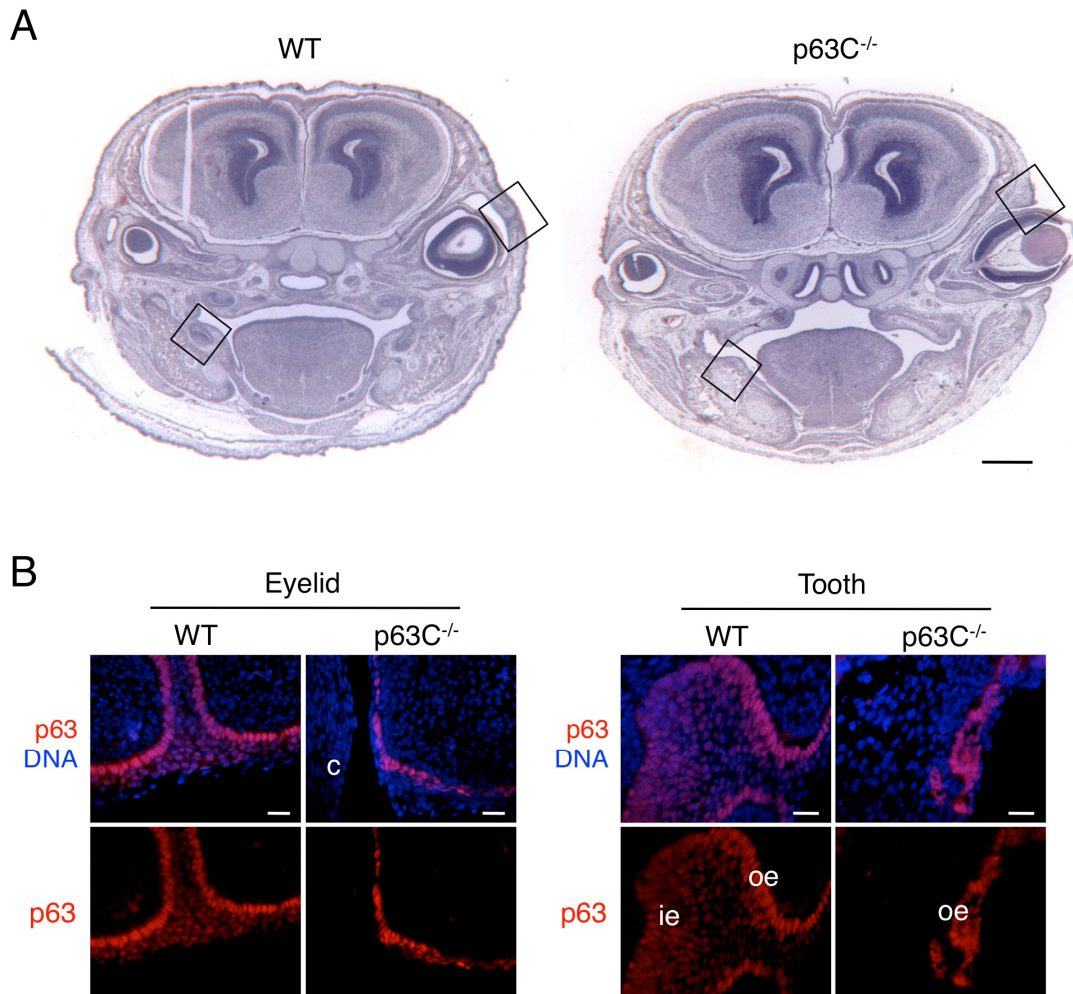

**Fig. S4. Reduced expansion of epithelial progenitor cells in the eyelid and tooth of p63C<sup>-/-</sup> mice.**

(A) H&E staining of coronal sections of the head of E17.5 WT and p63C<sup>-/-</sup> mice. Note that p63C<sup>-/-</sup> mice show poor development of molars and eyelids (boxed and highlighted in (B)) and palatal clefting (highlighted in Fig. 2B). Scale bar=500  $\mu$ m.

(B) Immunofluorescence of E17.5 WT and p63C<sup>-/-</sup> mouse eyelid and molar tooth epithelia with anti-p63 antibody, counterstained with Hoechst 33342. Note that while WT mouse eyelids are fused at the midline supported by the expansion of p63-positive epidermal progenitor cells, eyelid epithelium of p63C<sup>-/-</sup> mice remains thin and does not cover the cornea. In WT molars, p63-positive cells have increased cellularity

and formed inner and outer enamel epithelia. In contrast, p63<sup>C<sup>-</sup></sup> molars contain fewer p63-positive cells and remain as thickened dental epithelia. Scale bars=50 μm. *c*, cornea; *ie*, inner enamel epithelium; *oe*, outer enamel epithelium.



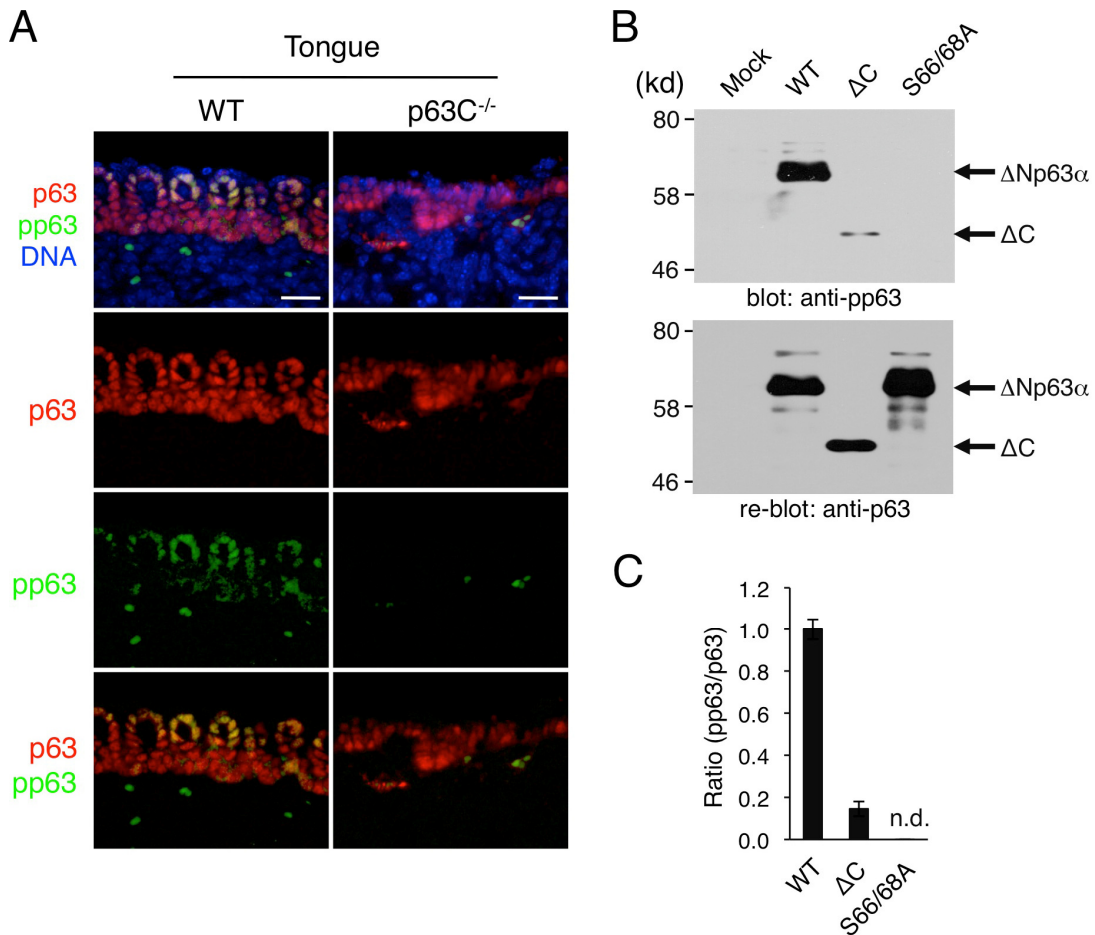

**Fig. S5. Reduced p63 phosphorylation in the tongue epithelium of p63C<sup>-/-</sup> mice and validation of the specificity of anti-pp63 antibody.**

(A) Immunofluorescence of E17.5 WT and p63C<sup>-/-</sup> mouse tongue epithelium with anti-p63 and anti-phosphorylated p63 (pp63) antibodies, counterstained with Hoechst 33342. Note that p63C<sup>-/-</sup> epithelium shows significantly reduced levels of p63 phosphorylation (*green*). Scale bars=50 μm. (B) Validation of the specificity of anti-pp63 antibody. Full-length ΔNp63α (WT), ΔNp63ΔC and unphosphorylatable S66/68A mutant of ΔNp63α (Suzuki and Senoo, 2012) were transfected into HEK293T cells and Western blot was performed using whole cell extracts. The membrane was first probed with anti-pp63 antibody (top), stripped and then re-probed with anti-pan-p63 antibody (bottom). *kd*, kilodalton. (C) Quantification of (B)

showing that S66/68 phosphorylation is undetectable in S66/68A mutant of  $\Delta\text{Np63}\alpha$ . In this condition, S66/68 phosphorylation of  $\Delta\text{Np63}\Delta\text{C}$  isoform is significantly reduced compared to that of WT  $\Delta\text{Np63}\alpha$  isoform. *n.d.*, not detected.

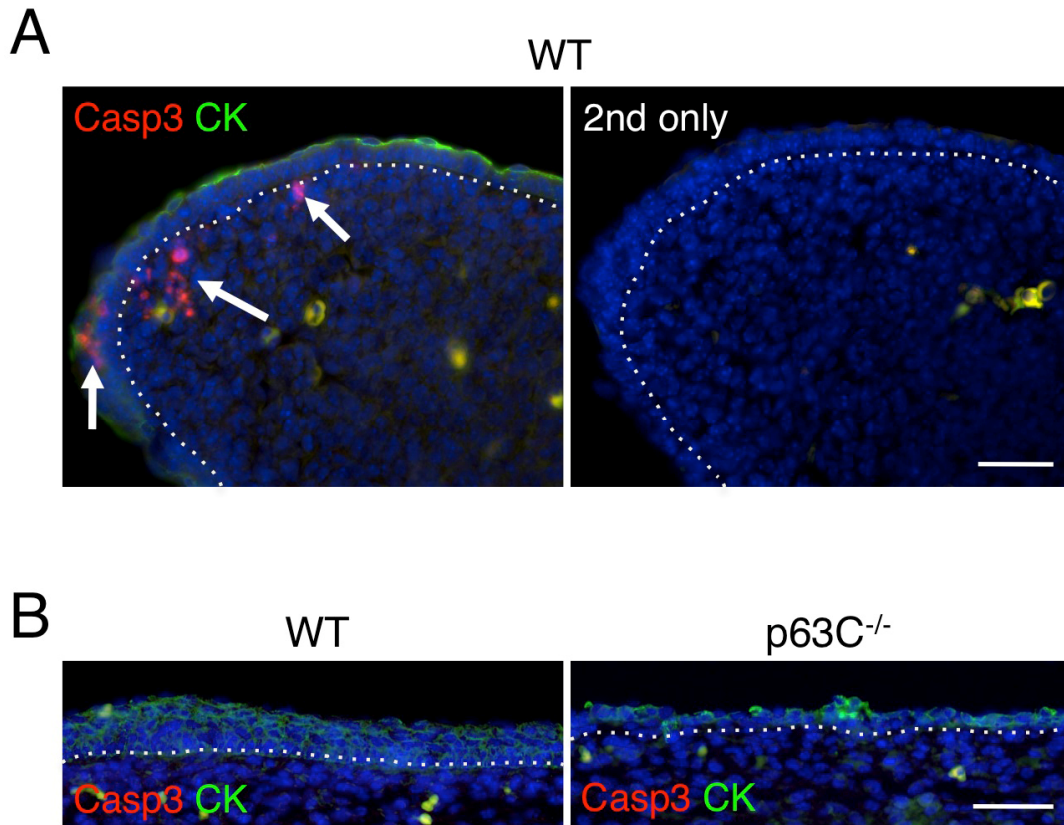

**Fig. S6. No change in apoptosis of epidermal cells by loss of the p63 C-terminus.**

(A) Immunofluorescence of developing forelimbs of E13.5 WT mouse embryos with anti-cleaved caspase-3 (Casp3) and anti-pan-cytokeratin (CK) antibodies, counterstained with Hoechst 33342 (left panel). Some epidermal and mesenchymal cells in developing limbs at this stage undergo apoptosis as described previously (Ali-Khan and Hales, 2003), thus serving as a positive control for this marker (arrows). Right panel shows staining with secondary antibodies alone, serving as a negative control. Staining of these two slides was performed simultaneously with those shown in (B). Dotted lines indicate ectoderm-mesenchyme border. Scale bar=50  $\mu$ m. (B) Immunofluorescence of E15.5 WT and p63C<sup>-/-</sup> mouse epidermis with anti-Casp3 and anti-CK antibodies, counterstained with Hoechst 33342. Note that Casp3-positive cells were undetectable in both WT and p63C<sup>-/-</sup> mice. Dotted lines indicate epidermal-dermal border. Scale bar=50  $\mu$ m.

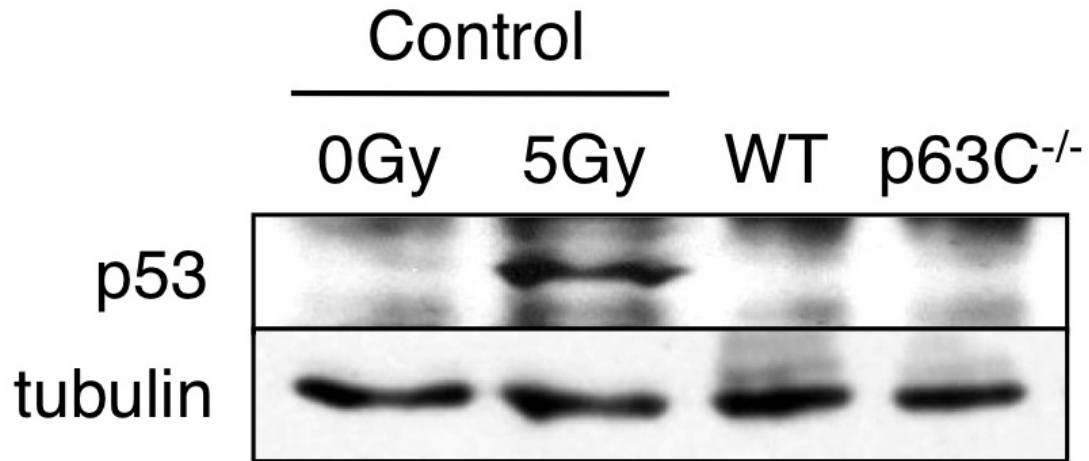

**Fig. S7. No change in p53 expression in epidermal cells by loss of the p63 C-terminus.**

Western blot of whole epidermal cell extracts from E15.5 WT and p63C<sup>-/-</sup> mouse embryos with anti-p53 antibody. Freshly isolated thymocytes untreated (-) or treated (+) with 5Gy  $\gamma$ -irradiation were used as a negative and a positive control, respectively. Anti-tubulin  $\alpha$  antibody was used as a loading control.

**Table S1. Primers used in this study**

| Primer                                    | Sequence (5'-3')                                           | Product |
|-------------------------------------------|------------------------------------------------------------|---------|
| <b>Genotyping p63C<sup>-/-</sup> mice</b> |                                                            |         |
| <i>Neo</i> allele                         | GGGTGGGGTGGGATTAGATAAATG and<br>GAATGCTGTCTTGTGGTTGA       | 260 bp  |
| $\Delta$ <i>Neo</i> allele*               | AGGTATAGAATGCATGAAGG and<br>GAATGCTGTCTTGTGGTTGA           | 350 bp  |
| <i>Cre</i> transgene                      | TCCAATTTACTGACCGTACACCAA and<br>CCTGATCCTGGCAATTCGGCTA     | 540 bp  |
| <b>Genotyping p63-null mice</b>           |                                                            |         |
| <i>Neo</i> allele                         | GAGCTGAGCCGTGAGTTCAATGAGG and<br>GGTGGATGTGGAATGTGTGCGAGGC | 1.3 kb  |
| $\Delta$ <i>Neo</i> allele                | GAGCTGAGCCGTGAGTTCAATGAGG and<br>GCAGATGAACTTCAGGGTCAG     | 174 bp  |
| WT <i>p63</i> allele                      | AAGCATTGTTTCCTGTTTATTTCTGG and<br>GACAAAGGCTATGACAGACAT    | 778 bp  |
| <b>qPCR</b>                               |                                                            |         |
| TAp63-forward                             | TACTGCCCCGACCCTTACAT                                       |         |
| TAp63-reverse                             | GCTGAGGAACTCGCTTGTCTG                                      |         |
| $\Delta$ Np63-forward                     | TGCCCAGACTCAATTTAGTG                                       |         |
| $\Delta$ Np63-reverse                     | TGGAGCTGGGCTGTGCATAG                                       |         |
| Rps18-forward                             | CATGCAGAACCCACGACAGTA                                      |         |
| Rps18-reverse                             | CCTCACGCAGCTTGTGTCTA                                       |         |
| p21 <sup>WAF1/CIP1</sup> -forward         | CGATGGAACTTCGACTTTGTCA                                     |         |
| p21 <sup>WAF1/CIP1</sup> -reverse         | GCACAAGGGTACAAGACAGTG                                      |         |
| GAPDH-forward                             | AGCCACATCGCTCAGACAC                                        |         |
| GAPDH-reverse                             | GCCCAATACGACCAAATCC                                        |         |
| <b>p63 C-terminus splicing</b>            |                                                            |         |
| Exon 11-forward                           | GAACAGCATGAACAAGCTGCC                                      |         |
| Exon 14-reverse                           | GCTCATTCTCCTTCCTTTG                                        |         |
| Exon 6-forward                            | GCCCAGTATGTAGAAGATCC                                       |         |
| Exon 12/14-reverse                        | TCAGACTTGCCAAATCCTGAC                                      |         |
| Exon 10'-reverse                          | CTATGGGTACACGGAGTGGT                                       |         |

\*This primer pair also amplifies the WT *p63* allele (461 bp).
